# Supplementary material for: Exometabolomic exploration of culturable airborne microorganisms from an urban atmosphere
Source: Copernicus journal article supplement (doi:10.5194/acp-25-1805-2025), 2025-02-10
Supplement: Supplementary file 1 [file acp-25-1805-2025-supplement.pdf]

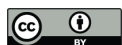

*Supplement of*

## **Exometabolomic exploration of culturable airborne microorganisms from an urban atmosphere**

**Rui Jin et al.**

*Correspondence to:* Wei Hu ([huwei@tju.edu.cn](mailto:huwei@tju.edu.cn)) and Pingqing Fu ([fupingqing@tju.edu.cn](mailto:fupingqing@tju.edu.cn))

The copyright of individual parts of the supplement might differ from the article licence.

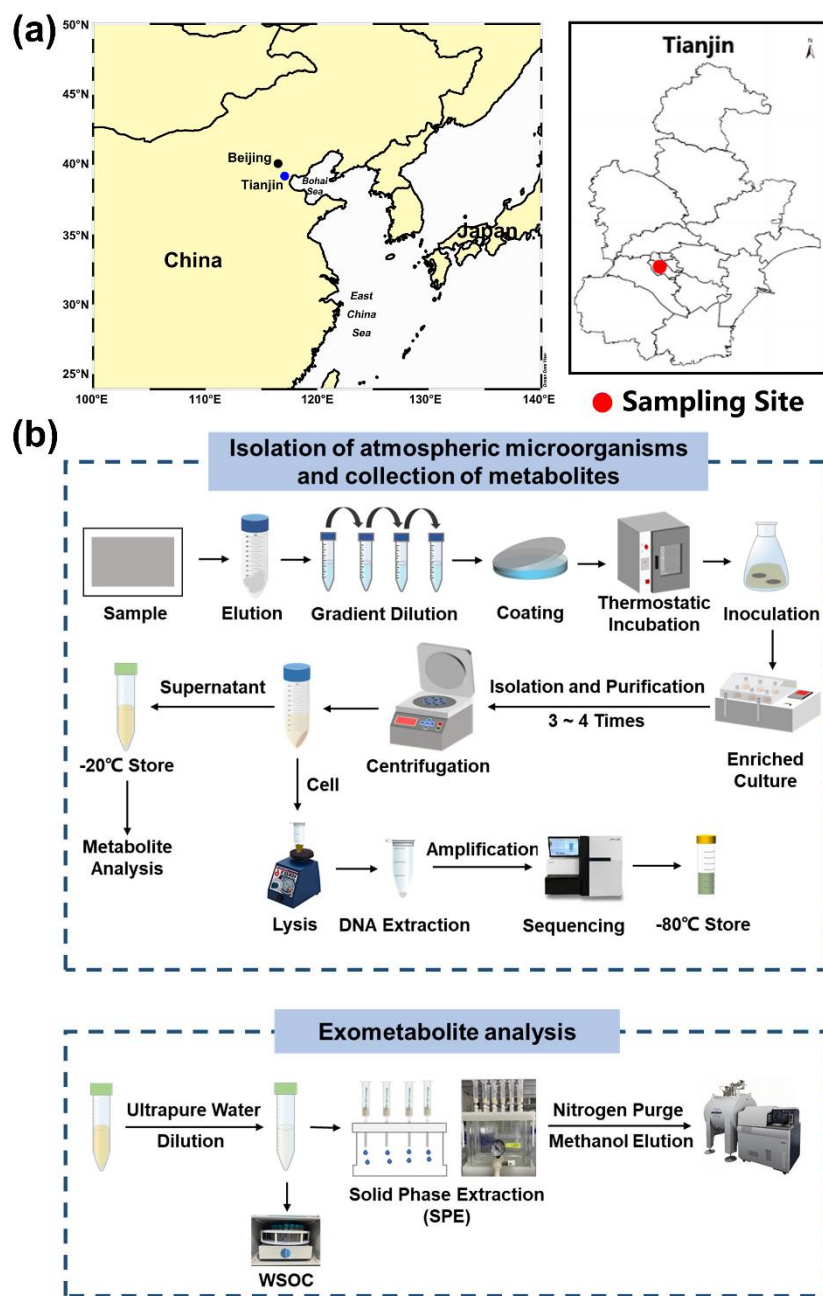

**Figure S1.** The location of culturable airborne microorganisms and experimental procedures. (a) The map shows the location of Tianjin city and the urban sampling site in the Nankai district, Tianjin (the map is from Schlitzer, Reiner, Ocean Data View, <https://odv.awi.de>, 2024). (b) Experimental procedures include the isolation of atmospheric microorganisms, collection of metabolites, and exometabolite analysis.

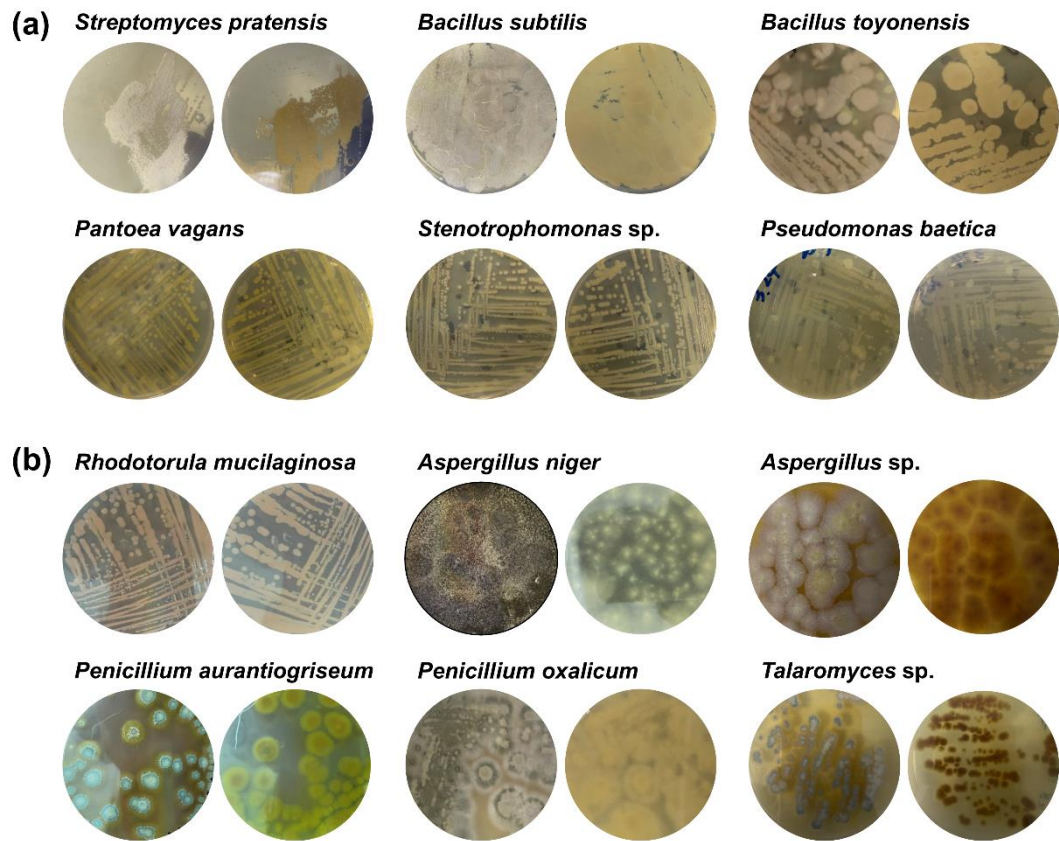

**Figure S2.** The representative bacterial (a) and fungal (b) strains isolated atmospheric microorganisms.

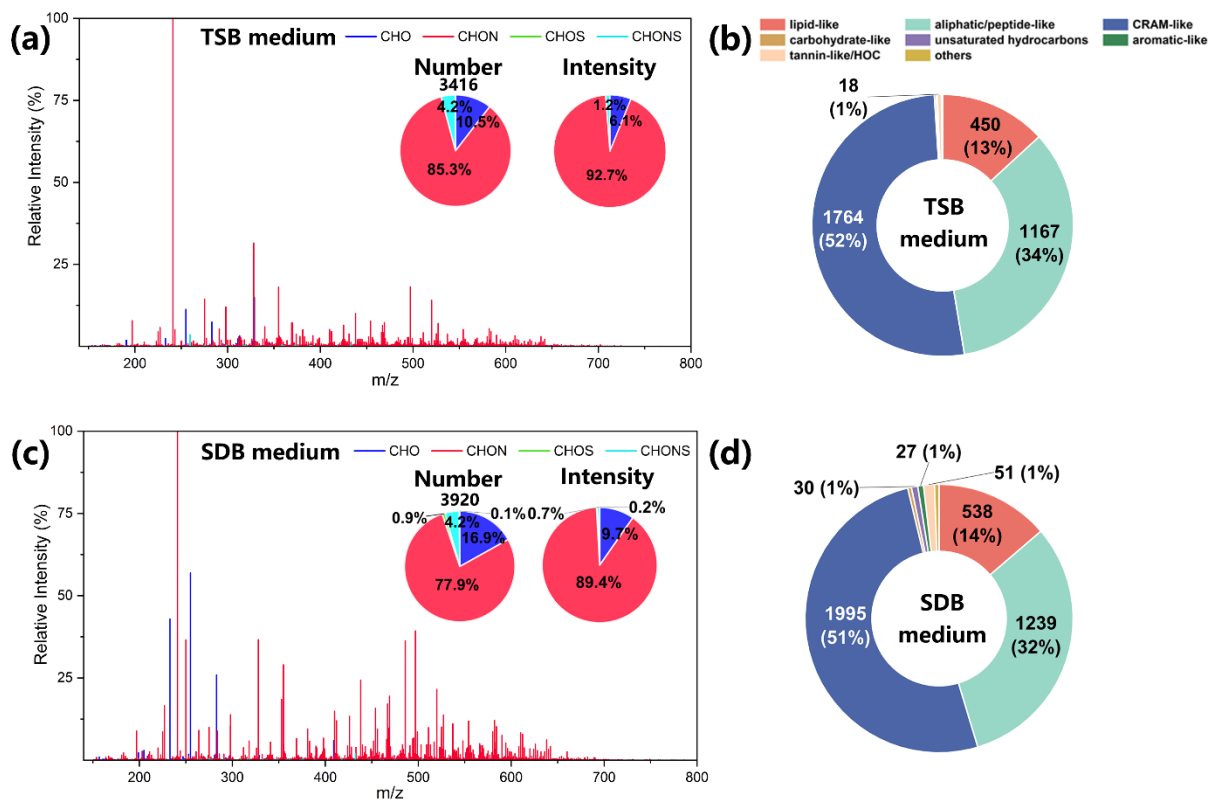

**Figure S3.** Mass spectra and different categories of organic compounds in the initial culture broths. (a-b) The mass spectrum and elemental composition of TSB used for bacterial growth (a), and the formula numbers of different categories of organic matter for TSB (b). (c-d) The mass spectrum and elemental composition of SDB used for fungal growth (c), and the formula numbers of different categories of organic matter for SDB (d).

10

15

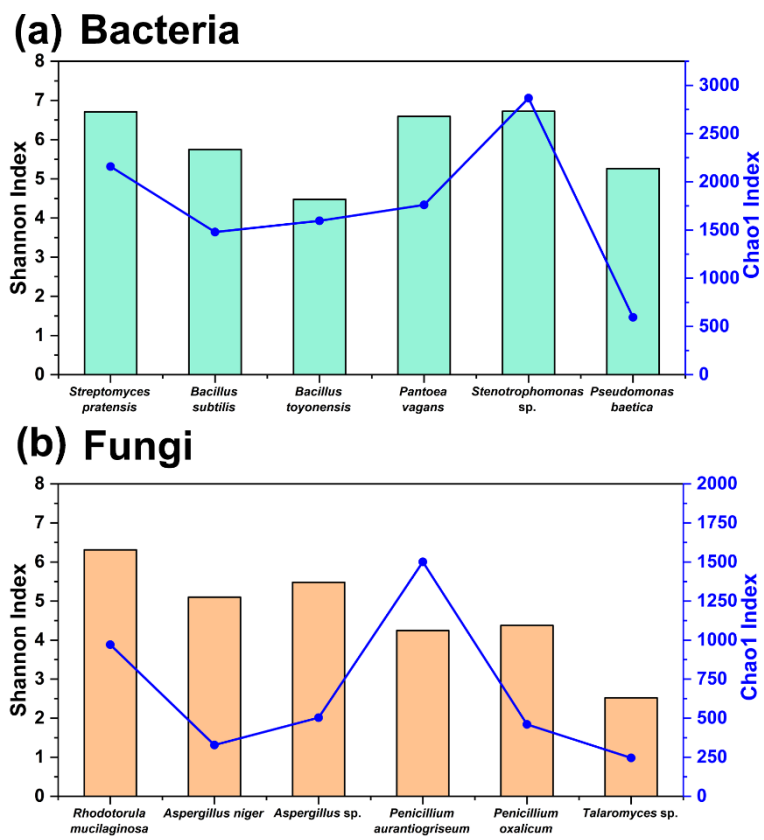

**Figure S4.** The molecular diversity of bacterial (a) and fungal (b) exometabolites.

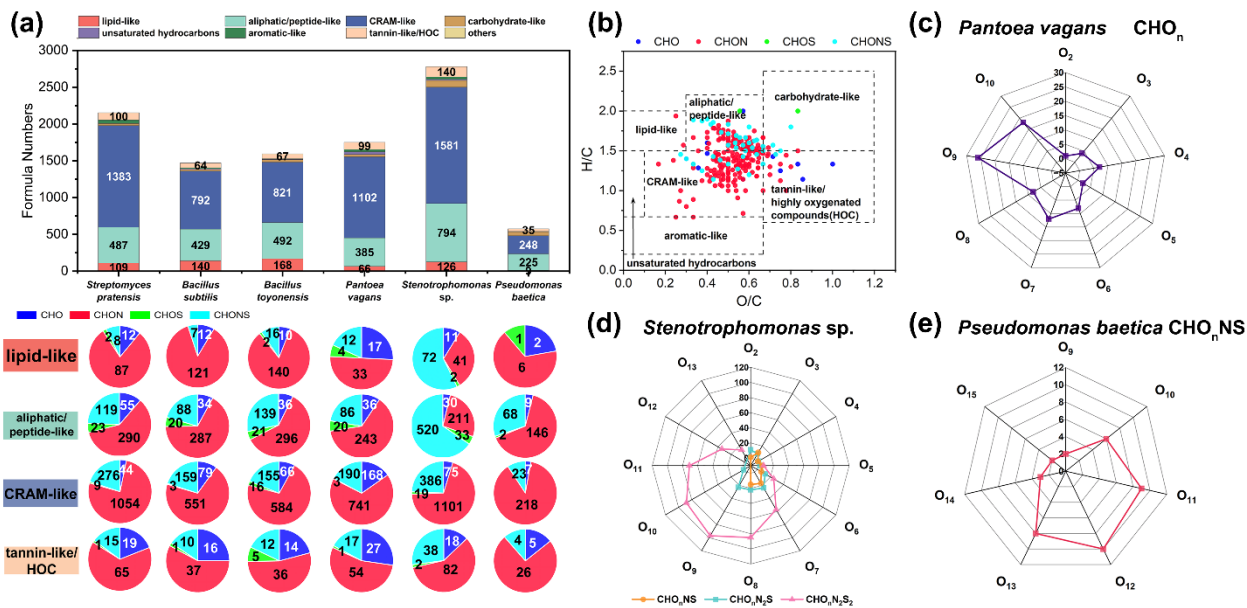

20 **Figure S5.** The formula categories of bacterial exometabolites and differences in the molecular composition of shared and  
 unique exometabolites among bacterial strains. (a) Stacked bars illustrate formula categories based on H/C and O/C ratios in  
 bacterial exometabolites, and pie charts illustrate the elemental compositions of high abundance categories. (b) van Krevelen  
 diagrams illustrate the shared molecules. Radar maps show the distribution of oxygen number of unique CHO compounds in  
 exometabolites from *Pantoea vagans* (c) and the distribution of oxygen number of unique CHONS compounds in  
 25 exometabolites from *Stenotrophomonas* sp. (d) and *Pseudomonas baetica* (e).

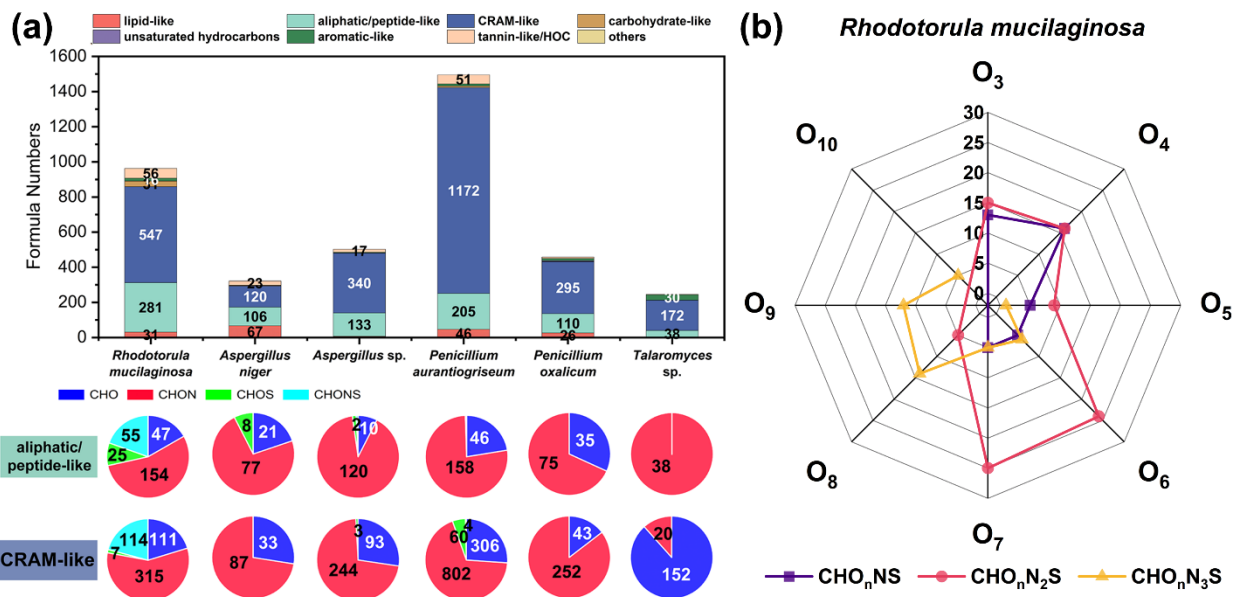

**Figure S6.** The formula categories of fungal exometabolites (a) and the distribution of oxygen number for unique CHONS compounds in exometabolites from *Rhodotorula mucilaginosa* (b). Stacked bars illustrate formula categories based on H/C and O/C ratios in fungal exometabolites, and pie charts illustrate the elemental compositions of high abundance categories.

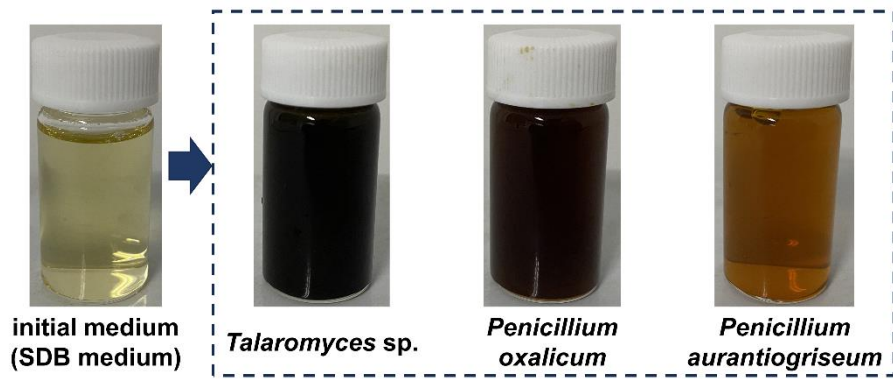

**Figure S7.** Changes in the supernatant of the culture media for the genera *Penicillium* and *Talaromyces* after 14 days.





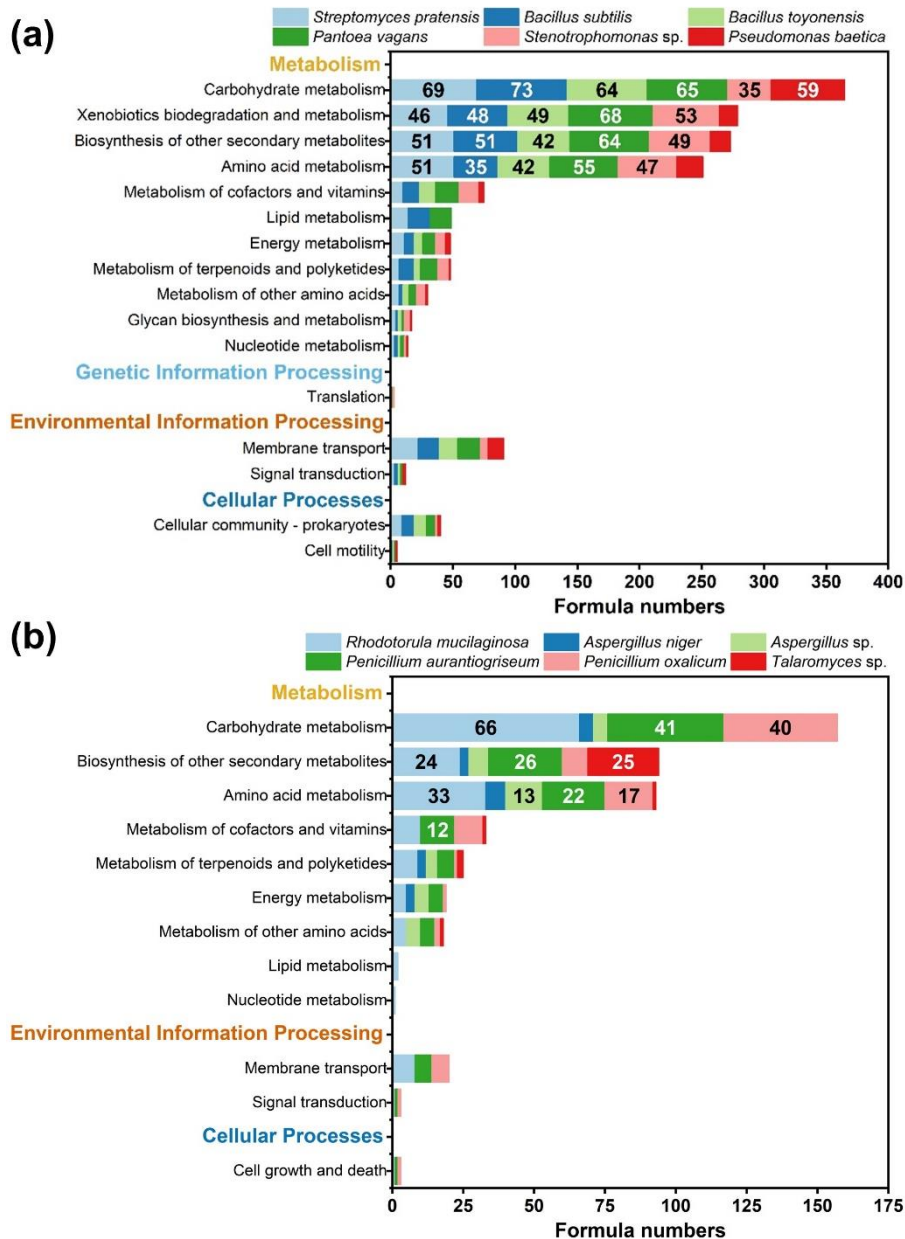

40

**Figure S9.** The KEGG metabolic pathways of typical bacterial (a) and fungal (b) strains enriched and analyzed based on their exometabolites, including both primary and secondary pathways.

**Table S1** Compositions of the media used for isolation of culturable bacteria and fungi in the urban atmosphere.

| <b>Component</b>       | <b>Tryptic soy agar (TSA)</b> | <b>Tryptic soy broth (TSB)</b> | <b>Sabouraud dextrose agar (SDA)</b> | <b>Sabouraud dextrose broth (SDB)</b> |
|------------------------|-------------------------------|--------------------------------|--------------------------------------|---------------------------------------|
| Tryptone               | 15 g                          | 15 g                           | -                                    | -                                     |
| Soy peptone            | 5 g                           | 5 g                            | -                                    | -                                     |
| NaCl                   | 5 g                           | 5 g                            | -                                    | -                                     |
| Peptone                | -                             | -                              | 10 g                                 | 10 g                                  |
| Glucose                | -                             | -                              | 40 g                                 | 40 g                                  |
| Agar                   | 15 g                          | -                              | 20 g                                 | -                                     |
| Double distilled water | 1000 mL                       | 1000 mL                        | 1000 mL                              | 1000 mL                               |

45

**Table S2** Identities of cultivable bacteria derived from aerosol samples.

| Isolate ID | Isolated strains                         | BLAST Identity                      | % Identity | Phylum         | Class               | Order            | Family            |
|------------|------------------------------------------|-------------------------------------|------------|----------------|---------------------|------------------|-------------------|
| B1         | <i>Bacillus</i> sp. TJB1                 | <i>Bacillus</i> sp.                 | 99.93%     | Bacillota      | Bacilli             | Bacillales       | Bacillaceae       |
| B2         | <i>Pantoea vagans</i> TJB2               | <i>Pantoea vagans</i>               | 100.00%    | Pseudomonadota | Gammaproteobacteria | Enterobacterales | Erwiniaceae       |
| B3         | <i>Streptomyces thermoviolaceus</i> TJB3 | <i>Streptomyces thermoviolaceus</i> | 100.00%    | Actinomycetota | Actinobacteria      | Streptomycetales | Streptomycetaceae |
| B4         | <i>Bacillus subtilis</i> TJB4            | <i>Bacillus subtilis</i>            | 99.17%     | Bacillota      | Bacilli             | Bacillales       | Bacillaceae       |
| B5         | <i>Streptomyces thermoviolaceus</i> TJB5 | <i>Streptomyces thermoviolaceus</i> | 99.93%     | Actinomycetota | Actinobacteria      | Streptomycetales | Streptomycetaceae |
| B6         | <i>Bacillus</i> sp. TJB6                 | <i>Bacillus</i> sp. Y1(2012)        | 99.93%     | Bacillota      | Bacilli             | Bacillales       | Bacillaceae       |
| B7         | <i>Bacillus subtilis</i> TJB7            | <i>Bacillus subtilis</i>            | 100.00%    | Bacillota      | Bacilli             | Bacillales       | Bacillaceae       |
| B8         | <i>Erwinia</i> sp. TJB8                  | <i>Erwinia</i> sp.                  | 100.00%    | Pseudomonadota | Gammaproteobacteria | Enterobacterales | Erwiniaceae       |
| B9         | <i>Erwinia</i> sp. TJB9                  | <i>Erwinia</i> sp.                  | 100.00%    | Pseudomonadota | Gammaproteobacteria | Enterobacterales | Erwiniaceae       |
| B10        | <i>Streptomyces pratensis</i> TJB10      | <i>Streptomyces pratensis</i>       | 99.12%     | Actinomycetota | Actinobacteria      | Streptomycetales | Streptomycetaceae |
| B11        | <i>Streptomyces</i> sp. TJB11            | <i>Streptomyces</i> sp. SYP-A7193   | 99.93%     | Actinomycetota | Actinobacteria      | Streptomycetales | Streptomycetaceae |
| B12        | <i>Bacillus</i> sp. TJB12                | <i>Bacillus</i> sp. 210_62          | 99.72%     | Bacillota      | Bacilli             | Bacillales       | Bacillaceae       |
| B13        | <i>Pseudomonas</i> sp. TJB13             | <i>Pseudomonas</i> sp.              | 99.93%     | Pseudomonadota | Gammaproteobacteria | Pseudomonadales  | Pseudomonadaceae  |
| B14        | <i>Pantoea vagans</i> TJB14              | <i>Pantoea vagans</i>               | 99.32%     | Pseudomonadota | Gammaproteobacteria | Enterobacterales | Erwiniaceae       |
| B15        | <i>Pseudomonas</i> sp. TJB15             | <i>Pseudomonas</i> sp. B14-6        | 100.00%    | Pseudomonadota | Gammaproteobacteria | Pseudomonadales  | Pseudomonadaceae  |
| B16        | <i>Stenotrophomonas</i> sp. TJB16        | <i>Stenotrophomonas</i> sp.         | 99.79%     | Pseudomonadota | Gammaproteobacteria | Xanthomonadales  | Xanthomonadaceae  |
| B17        | <i>Pseudomonas fluorescens</i> TJB17     | <i>Pseudomonas fluorescens</i>      | 100.00%    | Pseudomonadota | Gammaproteobacteria | Pseudomonadales  | Pseudomonadaceae  |
| B18        | <i>Bacillus toyonensis</i> TJB18         | <i>Bacillus toyonensis</i>          | 100.00%    | Bacillota      | Bacilli             | Bacillales       | Bacillaceae       |
| B19        | <i>Pseudomonas</i> sp. TJB19             | <i>Pseudomonas</i> sp.              | 99.71%     | Pseudomonadota | Gammaproteobacteria | Pseudomonadales  | Pseudomonadaceae  |
| B20        | <i>Bacillus halotolerans</i> TJB20       | <i>Bacillus halotolerans</i>        | 100.00%    | Bacillota      | Bacilli             | Bacillales       | Bacillaceae       |
| B21        | <i>Bacillus proteolyticus</i> TJB21      | <i>Bacillus proteolyticus</i>       | 100.00%    | Bacillota      | Bacilli             | Bacillales       | Bacillaceae       |
| B22        | <i>Bacillus safensis</i> TJB22           | <i>Bacillus safensis</i>            | 100.00%    | Bacillota      | Bacilli             | Bacillales       | Bacillaceae       |
| B23        | <i>Pseudomonas baetica</i> TJB23         | <i>Pseudomonas baetica</i>          | 100.00%    | Pseudomonadota | Gammaproteobacteria | Pseudomonadales  | Pseudomonadaceae  |
| B24        | <i>Pseudomonas</i> sp. TJB24             | <i>Pseudomonas</i> sp.              | 99.85%     | Pseudomonadota | Gammaproteobacteria | Pseudomonadales  | Pseudomonadaceae  |

**Table S3** Identities of cultivable fungi derived from aerosol samples.

| Isolate ID | Isolated strains                              | BLAST Identity                       | % Identity | Phylum        | Class              | Order           | Family           |
|------------|-----------------------------------------------|--------------------------------------|------------|---------------|--------------------|-----------------|------------------|
| F1         | <i>Trametes elegans</i><br>TJF1               | <i>Trametes elegans</i>              | 100.00%    | Basidiomycota | Agaricomycetes     | Polyporales     | Polyporaceae     |
| F2         | <i>Talaromyces</i> sp. TJF2                   | <i>Talaromyces</i> sp.               | 100.00%    | Ascomycota    | Eurotiomycetes     | Eurotiales      | Trichocomaceae   |
| F3         | <i>Aspergillus niger</i><br>TJF3              | <i>Aspergillus niger</i>             | 100.00%    | Ascomycota    | Eurotiomycetes     | Eurotiales      | Aspergillaceae   |
| F4         | <i>Aspergillus</i> sp. TJF4                   | <i>Aspergillus</i> sp.               | 100.00%    | Ascomycota    | Eurotiomycetes     | Eurotiales      | Aspergillaceae   |
| F5         | <i>Aspergillus</i> sp. TJF5                   | <i>Aspergillus</i> sp.               | 100.00%    | Ascomycota    | Eurotiomycetes     | Eurotiales      | Aspergillaceae   |
| F6         | <i>Aspergillus nidulans</i><br>TJF6           | <i>Aspergillus nidulans</i>          | 100.00%    | Ascomycota    | Eurotiomycetes     | Eurotiales      | Aspergillaceae   |
| F7         | <i>Penicillium oxalicum</i><br>TJF7           | <i>Penicillium oxalicum</i>          | 100.00%    | Ascomycota    | Eurotiomycetes     | Eurotiales      | Aspergillaceae   |
| F8         | <i>Sarocladium terricola</i><br>TJF8          | <i>Sarocladium terricola</i>         | 100.00%    | Ascomycota    | Sordariomycetes    | Hypocreales     | Sarocladiaceae   |
| F9         | <i>Penicillium sumatraense</i> TJF9           | <i>Penicillium sumatraense</i>       | 100.00%    | Ascomycota    | Eurotiomycetes     | Eurotiales      | Aspergillaceae   |
| F10        | <i>Penicillium aurantiogriseum</i><br>TJF10   | <i>Penicillium aurantiogriseum</i>   | 100.00%    | Ascomycota    | Eurotiomycetes     | Eurotiales      | Aspergillaceae   |
| F11        | <i>Aspergillus</i> sp. TJF11                  | <i>Aspergillus</i> sp.               | 100.00%    | Ascomycota    | Eurotiomycetes     | Eurotiales      | Aspergillaceae   |
| F12        | <i>Aspergillus carneus</i><br>TJF12           | <i>Aspergillus carneus</i>           | 100.00%    | Ascomycota    | Eurotiomycetes     | Eurotiales      | Aspergillaceae   |
| F13        | <i>Cladosporium parahalotolerans</i><br>TJF13 | <i>Cladosporium parahalotolerans</i> | 100.00%    | Ascomycota    | Dothideomycetes    | Cladosporiales  | Cladosporiaceae  |
| F14        | <i>Rhodotorula mucilaginosa</i> TJF14         | <i>Rhodotorula mucilaginosa</i>      | 100.00%    | Basidiomycota | Microbotryomycetes | Sporidiobolales | Sporidiobolaceae |
| F15        | <i>Penicillium cinnamopurpureum</i><br>TJF15  | <i>Penicillium cinnamopurpureum</i>  | 100.00%    | Ascomycota    | Eurotiomycetes     | Eurotiales      | Aspergillaceae   |
| F16        | <i>Cladosporium</i> sp. TJF16                 | <i>Cladosporium</i> sp.              | 99.42%     | Ascomycota    | Dothideomycetes    | Cladosporiales  | Cladosporiaceae  |

**Table S4** The bacterial and fungal isolates used for exometabolomic studies.

| <b>Kingdom</b> | <b>Isolate ID</b> | <b>Isolated strains</b>                  | <b>Species</b>                     | <b>Category</b>        |
|----------------|-------------------|------------------------------------------|------------------------------------|------------------------|
| Bacteria       | B10               | <i>Streptomyces pratensis</i> TJB10      | <i>Streptomyces pratensis</i>      | Gram-positive bacteria |
|                | B4                | <i>Bacillus subtilis</i> TJB4            | <i>Bacillus subtilis</i>           | Gram-positive bacteria |
|                | B18               | <i>Bacillus toyonensis</i> TJB18         | <i>Bacillus toyonensis</i>         | Gram-positive bacteria |
|                | B2                | <i>Pantoea vagans</i> TJB2               | <i>Pantoea vagans</i>              | Gram-negative bacteria |
|                | B16               | <i>Stenotrophomonas</i> sp. TJB16        | <i>Stenotrophomonas</i> sp.        | Gram-negative bacteria |
|                | B23               | <i>Pseudomonas baetica</i> TJB23         | <i>Pseudomonas baetica</i>         | Gram-negative bacteria |
| Fungi          | F14               | <i>Rhodotorula mucilaginosa</i> TJF14    | <i>Rhodotorula mucilaginosa</i>    | yeast                  |
|                | F3                | <i>Aspergillus niger</i> TJF3            | <i>Aspergillus niger</i>           | mold                   |
|                | F5                | <i>Aspergillus</i> sp. TJF5              | <i>Aspergillus</i> sp.             | mold                   |
|                | F10               | <i>Penicillium aurantiogriseum</i> TJF10 | <i>Penicillium aurantiogriseum</i> | mold                   |
|                | F7                | <i>Penicillium oxalicum</i> TJF7         | <i>Penicillium oxalicum</i>        | mold                   |
|                | F2                | <i>Talaromyces</i> sp. TJF2              | <i>Talaromyces</i> sp.             | mold                   |

Note: The species names instead of the strain names are used in the figures and tables to facilitate the description of the different isolates.

55

**Table S5** Changes in the number of formulas after incubation for bacteria and fungi.

| Media / Species                    | Culture nutrients | Consumed |           |           | Resistant |           |           | Produced |           |           | Total    |
|------------------------------------|-------------------|----------|-----------|-----------|-----------|-----------|-----------|----------|-----------|-----------|----------|
|                                    |                   | Number   | H/C       | O/C       | Number    | H/C       | O/C       | Number   | H/C       | O/C       | Number   |
| <b>Before incubation</b>           |                   |          |           |           |           |           |           |          |           |           |          |
| TSB                                | -                 | -        |           |           | -         |           |           | -        |           |           | 3416     |
| SDB                                | -                 | -        |           |           | -         |           |           | -        |           |           | 3920     |
| <b>After incubation</b>            |                   |          |           |           |           |           |           |          |           |           |          |
| <i>Streptomyces pratensis</i>      | TSB               | 689      | 1.60      | 0.31      | 2727      | 1.46      | 0.39      | 2158     | 1.32      | 0.46      | 4885     |
| <i>Bacillus subtilis</i>           | TSB               | 477      | 1.56      | 0.30      | 2939      | 1.47      | 0.39      | 1479     | 1.43      | 0.44      | 4418     |
| <i>Bacillus toyonensis</i>         | TSB               | 708      | 1.58      | 0.32      | 2708      | 1.46      | 0.39      | 1596     | 1.44      | 0.44      | 4304     |
| <i>Pantoea vagans</i>              | TSB               | 413      | 1.58      | 0.30      | 3003      | 1.47      | 0.39      | 1761     | 1.32      | 0.45      | 4764     |
| <i>Stenotrophomonas</i> sp.        | TSB               | 1198     | 1.57      | 0.36      | 2218      | 1.44      | 0.39      | 2868     | 1.42      | 0.46      | 5086     |
| <i>Pseudomonas baetica</i>         | TSB               | 1122     | 1.53      | 0.34      | 2294      | 1.47      | 0.39      | 651      | 1.65      | 0.53      | 2945     |
| Mean ± SE                          |                   | 768±133  | 1.57±0.01 | 0.32±0.01 | 2648±133  | 1.46±0.00 | 0.39±0.00 | 1752±301 | 1.43±0.05 | 0.46±0.01 | 4400±314 |
| <b>After incubation</b>            |                   |          |           |           |           |           |           |          |           |           |          |
| <i>Rhodotorula mucilaginosa</i>    | SDB               | 811      | 1.56      | 0.29      | 3109      | 1.45      | 0.40      | 971      | 1.39      | 0.48      | 4080     |
| <i>Aspergillus niger</i>           | SDB               | 1689     | 1.43      | 0.36      | 2231      | 1.50      | 0.39      | 328      | 1.53      | 0.40      | 2559     |
| <i>Aspergillus</i> sp.             | SDB               | 2049     | 1.50      | 0.34      | 1871      | 1.43      | 0.43      | 503      | 1.32      | 0.49      | 2374     |
| <i>Penicillium aurantiogriseum</i> | SDB               | 1262     | 1.55      | 0.33      | 2658      | 1.43      | 0.40      | 1501     | 1.26      | 0.44      | 4159     |
| <i>Penicillium oxalicum</i>        | SDB               | 1362     | 1.52      | 0.35      | 2558      | 1.44      | 0.40      | 460      | 1.33      | 0.39      | 3018     |
| <i>Talaromyces</i> sp.             | SDB               | 2531     | 1.48      | 0.36      | 1389      | 1.45      | 0.41      | 246      | 1.06      | 0.44      | 1635     |
| Mean ± SE                          |                   | 1617±250 | 1.51±0.02 | 0.34±0.01 | 2303±250  | 1.45±0.01 | 0.41±0.01 | 668±196  | 1.32±0.06 | 0.44±0.02 | 2971±406 |

60 **Table S6** The molecular weight distribution of the typical bacterial and fungal exometabolites.

| Species                            | Low Molecular Weight<br>(LMW)<br>(150 – 300 Da) | Medium Molecular Weight<br>(MMW)<br>(300 – 500 Da) | High Molecular Weight<br>(HMW)<br>(500 – 800 Da) | Total        |
|------------------------------------|-------------------------------------------------|----------------------------------------------------|--------------------------------------------------|--------------|
| <b>Bacteria</b>                    |                                                 |                                                    |                                                  |              |
| <i>Streptomyces pratensis</i>      | 665<br>30.8%                                    | 1034<br>47.9%                                      | 459<br>21.3%                                     | 2158<br>100% |
| <i>Bacillus subtilis</i>           | 460<br>31.1%                                    | 731<br>49.4%                                       | 288<br>19.5%                                     | 1479<br>100% |
| <i>Bacillus toyonensis</i>         | 540<br>33.8%                                    | 774<br>48.5%                                       | 282<br>17.7%                                     | 1596<br>100% |
| <i>Pantoea vagans</i>              | 617<br>35.1%                                    | 837<br>47.5%                                       | 307<br>17.4%                                     | 1761<br>100% |
| <i>Stenotrophomonas</i> sp.        | 721<br>25.1%                                    | 1244<br>43.4%                                      | 903<br>31.5%                                     | 2868<br>100% |
| <i>Pseudomonas baetica</i>         | 123<br>18.9%                                    | 252<br>38.7%                                       | 276<br>42.4%                                     | 651<br>100%  |
| <b>Fungi</b>                       |                                                 |                                                    |                                                  |              |
| <i>Rhodotorula mucilaginosa</i>    | 318<br>32.7%                                    | 518<br>53.4%                                       | 135<br>13.9%                                     | 971<br>100%  |
| <i>Aspergillus niger</i>           | 55<br>16.8%                                     | 155<br>47.3%                                       | 118<br>35.9%                                     | 328<br>100%  |
| <i>Aspergillus</i> sp.             | 78<br>15.5%                                     | 299<br>59.4%                                       | 126<br>25.1%                                     | 503<br>100%  |
| <i>Penicillium aurantiogriseum</i> | 187<br>12.5%                                    | 929<br>61.9%                                       | 385<br>26.6%                                     | 1501<br>100% |
| <i>Penicillium oxalicum</i>        | 100<br>21.7%                                    | 222<br>48.3%                                       | 138<br>30.0%                                     | 460<br>100%  |
| <i>Talaromyces</i> sp.             | 54<br>21.9%                                     | 164<br>66.7%                                       | 28<br>11.4%                                      | 246<br>100%  |



**Table S7** The elemental compositions of the typical bacterial and fungal exometabolites.

| Species                         | CHO          | CHON          | CHOS       | CHONS         | CHONSP    | Total        |
|---------------------------------|--------------|---------------|------------|---------------|-----------|--------------|
| <b>Bacteria</b>                 |              |               |            |               |           |              |
| <i>Streptomyces pratensis</i>   | 137<br>6.4%  | 1552<br>71.9% | 43<br>2.0% | 426<br>19.7%  | 0<br>0.0% | 2158<br>100% |
| <i>Bacillus subtilis</i>        | 150<br>10.1% | 1022<br>69.1% | 37<br>2.5% | 270<br>18.3%  | 0<br>0.0% | 1479<br>100% |
| <i>Bacillus toyonensis</i>      | 134<br>8.4%  | 1070<br>67.0% | 52<br>3.3% | 340<br>21.3%  | 0<br>0.0% | 1596<br>100% |
| <i>Pantoea vagans</i>           | 262<br>14.9% | 1131<br>64.2% | 45<br>2.6% | 318<br>18.1%  | 5<br>0.2% | 1761<br>100% |
| <i>Stenotrophomonas</i> sp.     | 140<br>4.9%  | 1494<br>52.1% | 69<br>2.4% | 1165<br>40.6% | 0<br>0.0% | 2868<br>100% |
| <i>Pseudomonas baetica</i>      | 25<br>3.8%   | 405<br>62.2%  | 5<br>0.8%  | 216<br>33.2%  | 0<br>0.0% | 651<br>100%  |
| <b>Fungi</b>                    |              |               |            |               |           |              |
| <i>Rhodotorula mucilaginosa</i> | 203<br>20.9% | 525<br>54.1%  | 58<br>6.0% | 185<br>19.0%  | 0<br>0.0% | 971<br>100%  |
| <i>Aspergillus niger</i>        | 80<br>24.4%  | 233<br>71.0%  | 15<br>4.6% | 0<br>0.0%     | 0<br>0.0% | 328<br>100%  |
| <i>Aspergillus</i> sp.          | 120<br>23.9% | 377<br>74.9%  | 5<br>1.0%  | 1<br>0.2%     | 0<br>0.0% | 503<br>100%  |
| <i>Penicillium</i>              | 402<br>26.8% | 1017<br>67.7% | 71<br>4.7% | 10<br>0.7%    | 1<br>0.1% | 1501<br>100% |
| <i>aurantiogriseum</i>          | 94<br>20.4%  | 366<br>79.6%  | 0<br>0.0%  | 0<br>0.0%     | 0<br>0.0% | 460<br>100%  |
| <i>Penicillium oxalicum</i>     | 182<br>74.0% | 64<br>26.0%   | 0<br>0.0%  | 0<br>0.0%     | 0<br>0.0% | 246<br>100%  |

**Table S8** The formulas of possible pigments in exometabolites from *Penicillium* and *Talaromyces*.

| <b>Genus</b>         | <b>Species</b>                                 | <b>Pigment</b>                      | <b>Formula</b>                                  |                               |                                                |
|----------------------|------------------------------------------------|-------------------------------------|-------------------------------------------------|-------------------------------|------------------------------------------------|
| <i>Penicillium</i>   | <i>Penicillium oxalicum</i>                    | Carviolin                           | C <sub>16</sub> H <sub>12</sub> O <sub>6</sub>  |                               |                                                |
|                      |                                                | Phoenicin                           | C <sub>14</sub> H <sub>10</sub> O <sub>6</sub>  |                               |                                                |
|                      | <i>Penicillium aurantiogriseum</i>             | Naphthalic anhydride                | C <sub>21</sub> H <sub>22</sub> O <sub>9</sub>  |                               |                                                |
|                      |                                                | Carviolin                           | C <sub>16</sub> H <sub>12</sub> O <sub>6</sub>  |                               |                                                |
|                      |                                                | Phoenicin                           | C <sub>14</sub> H <sub>10</sub> O <sub>6</sub>  |                               |                                                |
|                      |                                                | Atrovenetin                         | C <sub>19</sub> H <sub>18</sub> O <sub>6</sub>  |                               |                                                |
|                      |                                                | (10Z)-12-carboxymonascorubin (PP-O) | C <sub>23</sub> H <sub>24</sub> O <sub>7</sub>  |                               |                                                |
|                      |                                                | N-glutaryl rubropunctamine          | C <sub>26</sub> H <sub>29</sub> NO <sub>8</sub> |                               |                                                |
|                      |                                                | Purpurquinone-A                     | C <sub>21</sub> H <sub>20</sub> O <sub>9</sub>  |                               |                                                |
|                      |                                                | Northerqueinone                     | C <sub>19</sub> H <sub>18</sub> O <sub>7</sub>  |                               |                                                |
|                      |                                                | Xanthomonasin A                     | C <sub>21</sub> H <sub>24</sub> O <sub>7</sub>  |                               |                                                |
|                      |                                                | <i>Talaromyces</i>                  | <i>Talaromyces</i> sp.                          | Trihydroxymethyl-antraquinone | C <sub>15</sub> H <sub>10</sub> O <sub>5</sub> |
|                      |                                                |                                     |                                                 | Phoenicin                     | C <sub>14</sub> H <sub>10</sub> O <sub>6</sub> |
| Carviolin            | C <sub>16</sub> H <sub>12</sub> O <sub>6</sub> |                                     |                                                 |                               |                                                |
| Naphthalic anhydride | C <sub>21</sub> H <sub>22</sub> O <sub>9</sub> |                                     |                                                 |                               |                                                |
| Purpurquinone-A      | C <sub>21</sub> H <sub>20</sub> O <sub>9</sub> |                                     |                                                 |                               |                                                |
| Northerqueinone      | C <sub>19</sub> H <sub>18</sub> O <sub>7</sub> |                                     |                                                 |                               |                                                |
| Mitorubrinol         | C <sub>21</sub> H <sub>18</sub> O <sub>8</sub> |                                     |                                                 |                               |                                                |
| Atrovenetin          | C <sub>19</sub> H <sub>18</sub> O <sub>6</sub> |                                     |                                                 |                               |                                                |
